# Supplementary material for: Effect of Drought Stress on Chlorophyll Fluorescence Parameters, Phytochemical Contents, and Antioxidant Activities in Lettuce Seedlings
Source: MDPI journal article supplement (doi:10.3390/horticulturae7080238), 2021-08-10
Supplement: s1 [file s1]

### Supplementary files

**Table S1.** Growth parameter of lettuce seedling as affected by drought stress during the experiment.

| Treatment time (day) | Treatment | Epicotyl (cm) | Number of leaves (ea) | Leaf length (cm) | Leaf width (cm) |
|----------------------|-----------|---------------|-----------------------|------------------|-----------------|
| 0                    | Control   | 0.11±0.03e    | 2.0±0.00e             | 3.78±0.41f       | 1.92±0.17c      |
|                      | Drought   | 0.28±0.04cd   | 3.2±0.42cd            | 6.66±0.44cd      | 2.96±0.17b      |
| 2                    | Control   | 0.26±0.05cd   | 3.0±0.47d             | 6.06±0.84cd      | 2.81±0.36b      |
|                      | Drought   | 0.28±0.04cd   | 3.2±0.42cd            | 6.66±0.44cd      | 2.96±0.17b      |
| 4                    | Control   | 0.33±0.05cd   | 4.1±0.32bc            | 6.94±0.79bc      | 3.05±0.27b      |
|                      | Drought   | 0.31±0.03bc   | 3.9±0.32cd            | 6.76±0.60bcd     | 2.90±0.19b      |
| 6                    | Control   | 0.39±0.06ab   | 4.8±0.42b             | 8.15±0.53ab      | 3.47±0.21ab     |
|                      | Drought   | 0.20±0.00d    | 3.4±0.52              | 5.42±0.56de      | 2.17±0.22c      |
| 8                    | Control   | 0.44±0.07a    | 6.1±0.57a             | 8.69±0.74a       | 3.92±0.41a      |
|                      | Drought   | 0.20±0.00d    | 3.3±0.48cd            | 4.47±0.49ef      | 1.93±0.26c      |

Values are mean ± SD of three replicates. Different letters within a column of each parameter are statistically significant at  $p < 0.05$  using Duncan's multiple range test.

**Table S2.** Changes in chlorophyll fluorescence parameters measured for lettuce seedlings as affected by drought stress during progressive treatment time.

| Treatment time (day) | Treatment | Fv/Fm      | Y(NO)      | F'v/F'm     | Y(PSII)      | qP          | qL          | Rfd          | qN            | NPQ          | Y(NPQ)      |
|----------------------|-----------|------------|------------|-------------|--------------|-------------|-------------|--------------|---------------|--------------|-------------|
| 0                    | Control   | 0.82±0.01a | 0.14±0.01b | 0.67±0.01a  | 0.37±0.04bcd | 0.56±0.05bc | 1.05±0.06a  | 2.34±0.22bc  | 0.64±0.03cde  | 1.22±0.14cde | 0.48±0.03bc |
|                      | Drought   | 0.82±0.01a | 0.14±0.01b | 0.67±0.01a  | 0.37±0.04bcd | 0.56±0.05bc | 1.05±0.06a  | 2.34±0.22bc  | 0.64±0.03cde  | 1.22±0.14cde | 0.48±0.03bc |
| 2                    | Control   | 0.82±0.00a | 0.15±0.00b | 0.66±0.01ab | 0.35±0.05cd  | 0.52±0.06c  | 1.01±0.07ab | 2.37±0.16bc  | 0.66±0.03bcde | 1.32±0.15bcd | 0.51±0.04bc |
|                      | Drought   | 0.82±0.00a | 0.16±0.01b | 0.36±0.01ab | 0.27±0.04ef  | 0.41±0.06de | 0.88±0.06c  | 2.14±0.29c   | 0.67±0.03bcd  | 1.36±0.13bcd | 0.57±0.03a  |
| 4                    | Control   | 0.81±0.00a | 0.14±0.00b | 0.67±0.02a  | 0.44±0.03ab  | 0.65±0.03ab | 1.11±0.05a  | 2.58±0.17abc | 0.63±0.04de   | 1.14±0.17de  | 0.42±0.03d  |
|                      | Drought   | 0.81±0.00a | 0.15±0.00b | 0.37±0.02b  | 0.40±0.04abc | 0.64±0.05ab | 1.04±0.06a  | 2.88±0.18a   | 0.69±0.04abc  | 1.43±0.24abc | 0.45±0.04cd |
| 6                    | Control   | 0.81±0.00a | 0.14±0.00b | 0.37±0.01a  | 0.46±0.02a   | 0.68±0.02ab | 1.13±0.02a  | 2.75±0.14ab  | 0.63±0.02de   | 1.14±0.09de  | 0.40±0.02d  |
|                      | Drought   | 0.81±0.01a | 0.16±0.01b | 0.61±0.01c  | 0.31±0.02abc | 0.51±0.03cd | 0.90±0.03bc | 2.56±0.28abc | 0.73±0.02abc  | 1.66±0.17abc | 0.53±0.02ab |
| 8                    | Control   | 0.82±0.00a | 0.14±0.00b | 0.65±0.01ab | 0.41±0.02abc | 0.64±0.03ab | 1.07±0.03a  | 3.04±0.16a   | 0.70±0.02abc  | 1.49±0.13ab  | 0.45±0.02cd |
|                      | Drought   | 0.71±0.05b | 0.29±0.09a | 0.56±0.03d  | 0.21±0.05f   | 0.38±0.09e  | 0.67±0.13d  | 1.35±0.56d   | 0.62±0.09e    | 0.97±0.36e   | 0.50±0.05bc |

Values are mean ± SD of ten biological replicates. Different letters within a column of each parameter are statistically significant at  $p < 0.05$  using Duncan's multiple range test. Refer to the table 1 for the description of each parameter.

**Table S3.** Summary of analysis of variance of chlorophyll fluorescence (CF) parameters in lettuce seedlings at the drought stress and treatment time.

| CF parameters                    | Water level (W) |              | Treatment time (T) |              | S x T   |              |
|----------------------------------|-----------------|--------------|--------------------|--------------|---------|--------------|
|                                  | F-value         | Significance | F-value            | Significance | F-value | Significance |
| F <sub>v</sub> /F <sub>m</sub>   | 48.552          | ***          | 37.059             | ***          | 41.866  | ***          |
| F' <sub>v</sub> /F' <sub>m</sub> | 111.044         | ***          | 44.626             | ***          | 25.865  | ***          |
| φPSII                            | 138.768         | ***          | 30.733             | ***          | 24.681  | ***          |
| NPQ                              | 2.632           | NS           | 3.409              | *            | 20.825  | ***          |
| qN                               | 3.983           | *            | 2.209              | NS           | 13.038  | ***          |
| qP                               | 104.997         | ***          | 32.330             | ***          | 22.094  | ***          |
| qL                               | 151.187         | ***          | 32.989             | ***          | 27.369  | ***          |
| Rfd                              | 50.308          | ***          | 17.560             | ***          | 44.366  | ***          |
| φNO                              | 39.198          | ***          | 19.855             | ***          | 24.483  | ***          |
| φNPQ                             | 57.122          | ***          | 22.365             | ***          | 11.216  | ***          |

\*, \*\*, \*\*\* indicate being significant at  $p < 0.05$ ,  $0.01$ , and  $0.001$ , respectively. NS: non-significant. Refer to the table 1 for the description of each parameter.
